# Supplementary material for: A Randomized Controlled Study to Evaluate the Safety and Reactogenicity of a Novel rVLP-Based Plant Virus Nanoparticle Adjuvant Combined with Seasonal Trivalent Influenza Vaccine Following Single Immunization in Healthy Adults 18–50 Years of Age
Source: MDPI journal article supplement (doi:10.3390/vaccines8030393), 2020-07-20
Supplement: s1 [file s1]

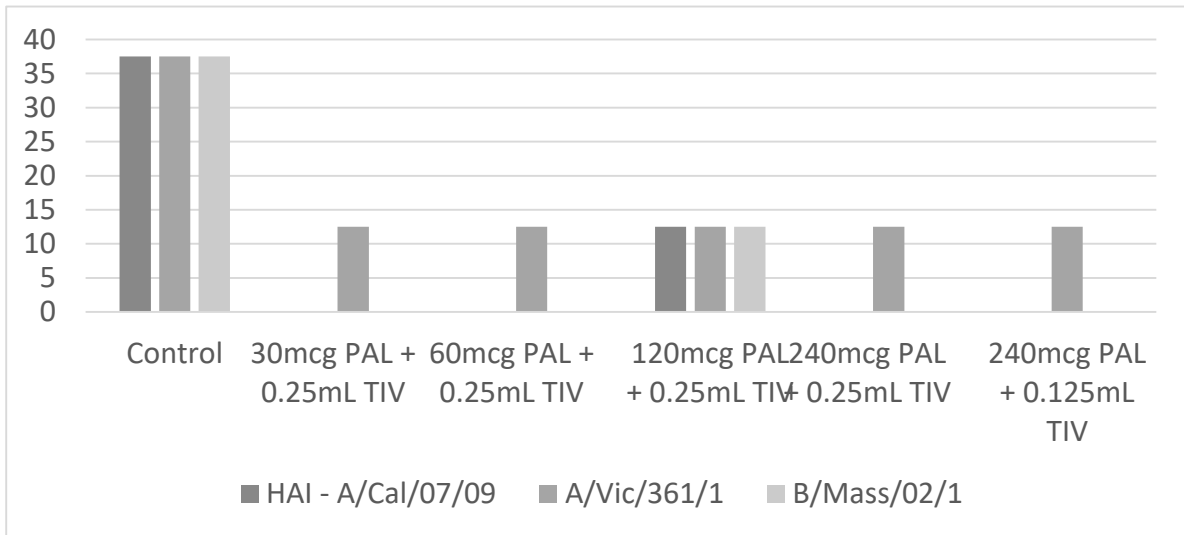

Supplemental Figure 1. Percentage of participants with 4-fold antibody rise of HI titer at Day 28

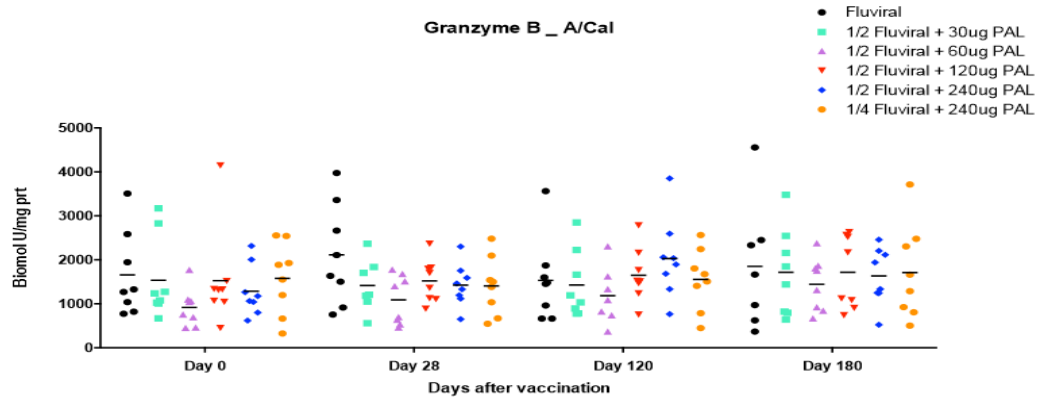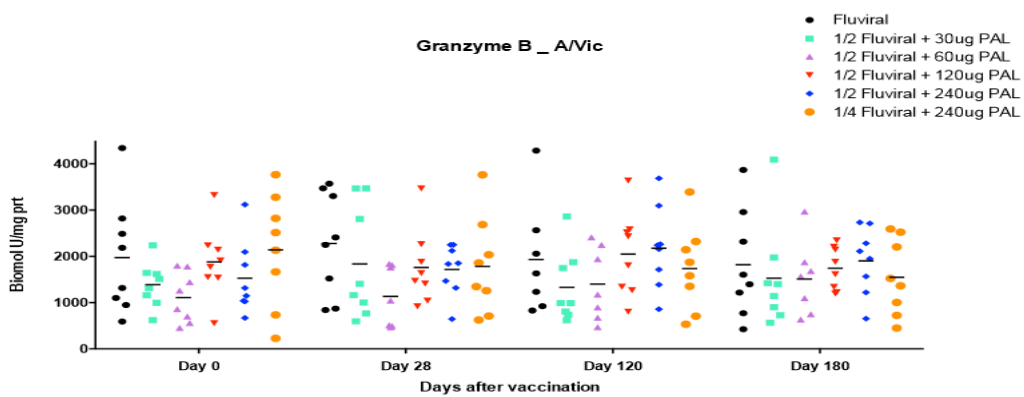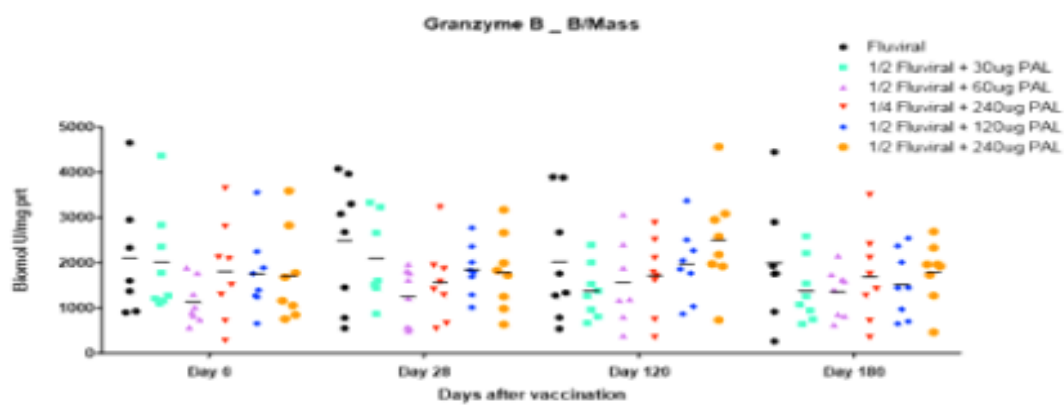

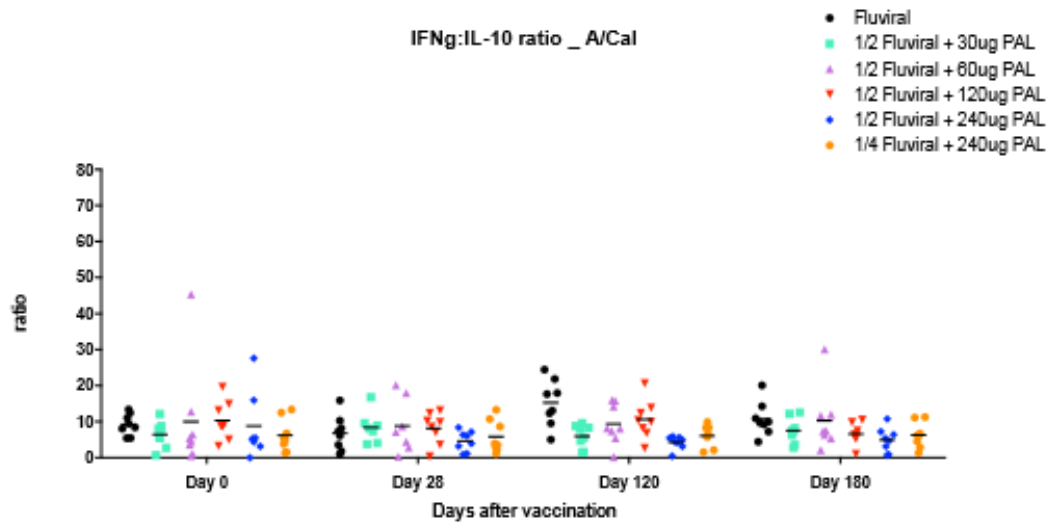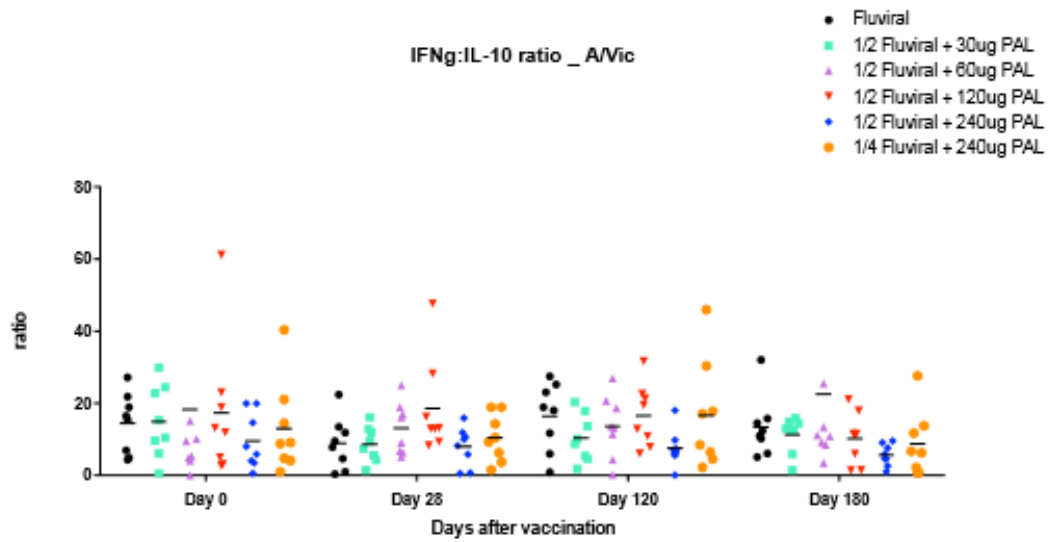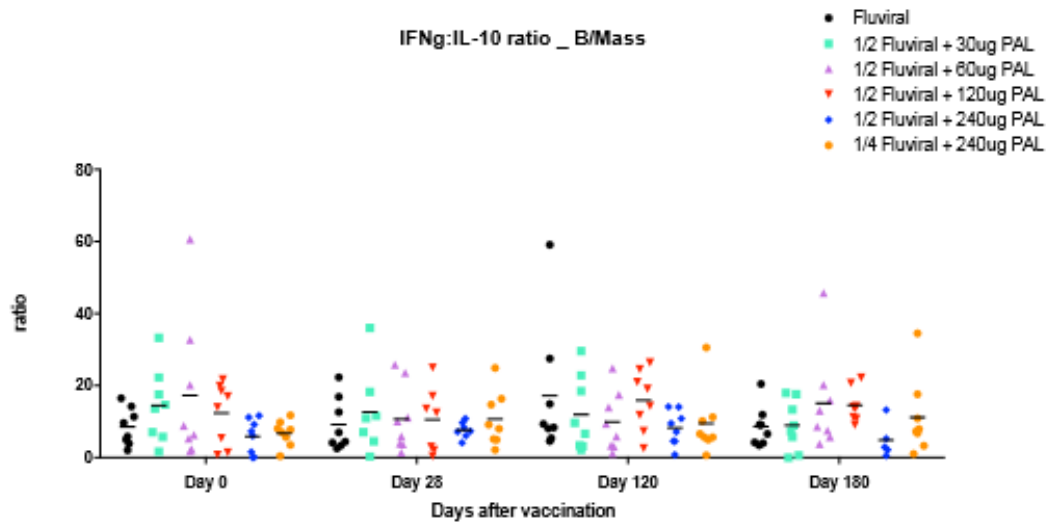

Supplemental Figure 2. Cell mediated Immune responses (Granzyme B and IFN- $\gamma$ :IL-10 responses to three influenza strains in TIV).

Supplemental Table 1. Adverse event Intensity Grading

| <b>Adverse Event</b>                                                         | <b>Intensity grade</b> | <b>Parameter</b>                                                                    |
|------------------------------------------------------------------------------|------------------------|-------------------------------------------------------------------------------------|
| Pain at injection site                                                       | 0                      | None                                                                                |
|                                                                              | 1                      | Mild: Any pain neither interfering with nor preventing normal every day activities. |
|                                                                              | 2                      | Moderate: Painful when limb is moved and interferes with every day activities.      |
|                                                                              | 3                      | Severe: Significant pain at rest. Prevents normal every day activities.             |
| Redness at injection site or Swelling at injection site                      |                        | Record greatest surface diameter in mm                                              |
|                                                                              | 0                      | ≤ 20 mm                                                                             |
|                                                                              | 1                      | > 20 mm to ≤ 50 mm                                                                  |
|                                                                              | 2                      | > 50 mm to ≤ 100 mm                                                                 |
| Fever*                                                                       |                        | Record temperature in °C/°F                                                         |
|                                                                              | 0                      | < 37.5 °C/ 99.5°F                                                                   |
|                                                                              | 1                      | ≥ 37.5 °C/ 99.5°F to ≤ 38.5 °C/ 101.3°F                                             |
|                                                                              | 2                      | > 38.5 °C/ 101.3°F to ≤ 39.5°C/ 103.1°F                                             |
| Headache                                                                     | 3                      | > 39.5°C/ 103.1°F                                                                   |
|                                                                              | 0                      | Normal                                                                              |
|                                                                              | 1                      | Mild: Headache that is easily tolerated                                             |
| Fatigue                                                                      | 2                      | Moderate: Headache that interferes with normal activity                             |
|                                                                              | 3                      | Severe: Headache that prevents normal activity                                      |
|                                                                              | 0                      | Normal                                                                              |
| Gastrointestinal symptoms (nausea, vomiting, diarrhea and/or abdominal pain) | 1                      | Mild: Fatigue that is easily tolerated                                              |
|                                                                              | 2                      | Moderate: Fatigue that interferes with normal activity                              |
|                                                                              | 3                      | Severe: Fatigue that prevents normal activity                                       |
| Gastrointestinal symptoms (nausea, vomiting, diarrhea and/or abdominal pain) | 0                      | Gastrointestinal symptoms normal                                                    |
|                                                                              | 1                      | Mild: Gastrointestinal symptoms that are easily tolerated                           |
|                                                                              | 2                      | Moderate: Gastrointestinal symptoms that interfere with normal activity             |
|                                                                              | 3                      | Severe: Gastrointestinal symptoms that prevent normal activity                      |
